# Supplementary material for: Biosynthesis of Conjugate Vaccines Using an O-Linked Glycosylation System
Source: PubMed Central journal article supplement (PMC4850263; doi:10.1128/mbio.00443-16), 2016-04-26
Supplement: mbo002162786s1.pdf [file mbo002162786s1.pdf]

## Supplemental methods

**Construction of ligase-defective strains.** Deletion of the *waaL* chromosomal gene was performed as described by Datsenko and Wanner (Datsenko KA, Wanner BL. 2000. Proc Natl Acad Sci U S A 97:6640-6645.) with minor modifications. Using the NCBI database of *waaI* (*waaL*) gene sequences from *S. flexneri* 2a strain 301, two approximately 500-bp fragments adjacent to the gene targeted for deletion were obtained as a linear DNA fragment through amplification using upstream and downstream primers: *waaIUP1/waaIUP2* and *waaIDP1/waaIDP2* (Supplementary Table 1). These two fragments were inserted into pET-kan, which contains a kanamycin resistance gene flanked by FRT (FLP recognition target) sites, creating the plasmid pET-Up-kan-Down. The primers *waaIUP1* and *waaIDP2* were used to amplify the template DNA from pET-Up-kan-Down, and the products were introduced into *S. flexneri* 2a 301/pKD46 competent cells by electroporation. *E. coli* O157Δ*waaL* and *Salmonella* paratyphi A strain CMCC 50973Δ*waaL* were created using the same method.

**Plaque assays.** Plaque assays were performed as described previously (Oaks EV, Wingfield ME, Formal SB. 1985. Infect Immun 48:124-129.). HeLa cells were seeded onto 6-well plates in 2 ml of tissue culture medium per well at 37 °C in a humidified atmosphere of 5% CO<sub>2</sub>:95% air. When the HeLa cells in each well were 80–90% confluent, Dulbecco's modified Eagle's medium without antibiotics or fetal bovine serum was used to wash the monolayers three times. The diluted bacterial suspension (2 ml) was added to the monolayer, and the cells were incubated at 37 °C for 90 min. During the incubation, the plates were rocked every 15 min. Next, the bacteria were aspirated and 2 ml of Dulbecco's modified Eagle's medium containing 5% fetal bovine

serum, 0.05% gentamicin, and 0.5% agarose was added to each well. After incubation at 37 °C in a humidified 5% CO<sub>2</sub>:95% air atmosphere for 72 h, the agarose was removed and 1 ml of 1% (wt/vol) crystal violet was added to each well for 15 min. The diameters of the plaques were measured using a phase contrast microscope.

**Sereny tests.** The kerato-conjunctivity test (Sereny test) in guinea pigs was performed as reported previously (Kopecko DJ. 1994. *Methods Enzymol* 235:39-47.) (Hanson CE, Ruble GR, Essiet I, Hartman AB. 2001. *Comp Med* 51:224-229.). A total of 25 µl of *S. flexneri* 2a strain 301 (about  $5.0 \times 10^8$  colony-forming units (CFU)) in phosphate-buffered saline (PBS) was micro-pipetted onto the conjunctiva of the eye, and the amount of inflammation was observed after 36 and 48 h.

**Determination of sugar content.** Sugar quantitation experiments were performed following an anthrone-sulfuric acid method. Briefly, 4 ml of anthrone-concentrated sulfuric acid ( $2 \text{ mg/ml}^{-1}$ ) was added to 1 ml of glucose solution of differing concentrations (0, 5, 10, 20, 30, 40, 60, or 80 µg/ml<sup>-1</sup>), 50 µl/ml<sup>-1</sup> OPS of *S. flexneri* 2a strain 301, and samples. After 10 min in a boiling water bath, the absorbance at OD<sub>620</sub> of the samples was measured on a microplate reader and Excel software was used to draw a standard curve line and calculate the sugar content.

**Calculation of the relative glycosylation.** To calculate the relative glycosylation, ELISA was used. Briefly, 96-well plates were coated with periplasmic fractions diluted in carbonate coating buffer. Total EPA and OPS were measured using an anti-EPA antibody (1:20,000) and anti-*S. flexneri* 2a OPS serum (1:40), respectively. HRP-conjugated goat anti-rabbit antibody (Transgen Biotech) diluted 1:5,000 in dilution buffer was used as the secondary antibody. Three

biological replicates were performed for each sample. A microplate reader was used to measure

the absorbance at OD<sub>490</sub>, and the resulting data were used in the formula ( $\frac{\text{OPS}/\text{EPA}(\text{each group})}{\text{OPS}/\text{EPA}(\text{control group})}$ ),

which showed relative glycosylation compared with that in the control group.
