# Supplementary material for: Biosynthesis of Conjugate Vaccines Using an O-Linked Glycosylation System
Source: PubMed Central journal article supplement (PMC4850263; doi:10.1128/mbio.00443-16), 2016-04-26

**FIG S6**

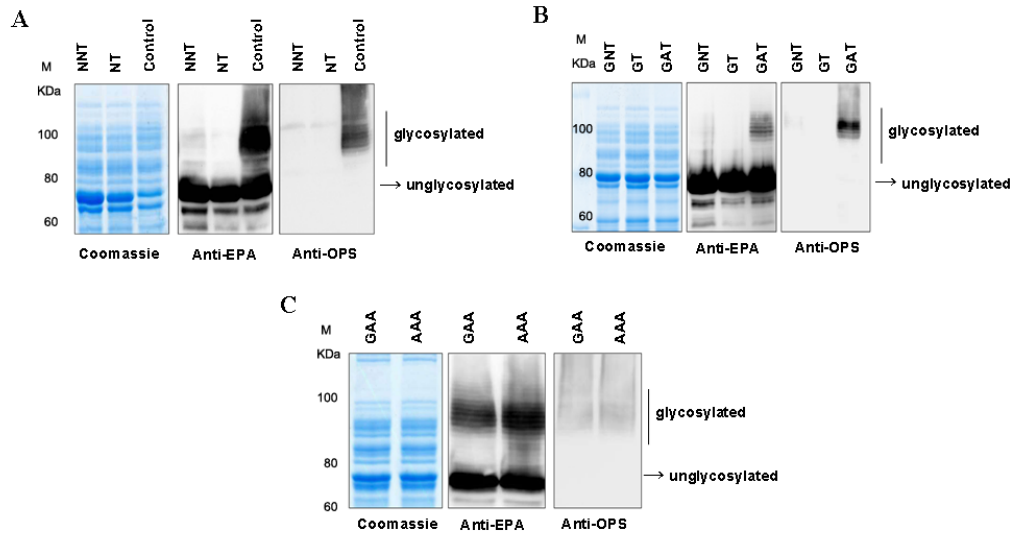

Supplement: mbo002162786sf6.pdf [file mbo002162786sf6.pdf]
