# Supplementary material for: Biosynthesis of Conjugate Vaccines Using an O-Linked Glycosylation System
Source: PubMed Central journal article supplement (PMC4850263; doi:10.1128/mbio.00443-16), 2016-04-26
Supplement: mbo002162786st1.pdf [file mbo002162786st1.pdf]

**Table S1 Primers used in our experiments**

| Primers                                                                                                                                                  | Primer sequences(5'→3')                                                      | Introduction                               |                  |
|----------------------------------------------------------------------------------------------------------------------------------------------------------|------------------------------------------------------------------------------|--------------------------------------------|------------------|
| 301waaIUP1                                                                                                                                               | <u>cgggatccgg</u> tatgggaagaatcaag                                           | Construction of ligase-defective strain    |                  |
| 301waaIUP2                                                                                                                                               | gc <u>gtc</u> gactcagaaatgctacgggtg                                          |                                            |                  |
| 301waaIDP1                                                                                                                                               | cca <u>agctt</u> ggaccttagacaatcaa                                           |                                            |                  |
| 301waaIDP2                                                                                                                                               | ccctc <u>gag</u> atgtaggaagcataaccg                                          |                                            |                  |
| 50973waaIUP1                                                                                                                                             | <u>cgggatccagg</u> cttgactatgtgga                                            | Construction of ligase-defective strain    |                  |
| 50973waaIUP2                                                                                                                                             | gc <u>gtc</u> gacatctggcgatagtagtatg                                         |                                            |                  |
| 50973waaIDP1                                                                                                                                             | cca <u>agctt</u> tagtgcaggcatattggg                                          |                                            |                  |
| 50973waaIDP2                                                                                                                                             | ccctc <u>gag</u> tatcacctcgcagaacct                                          |                                            |                  |
| PilE-U                                                                                                                                                   | c <u>ggaatt</u> catgaacaccctcaaaaaggttt                                      | Amplifying PilE                            |                  |
| PilE-D                                                                                                                                                   | ccca <u>agctt</u> tagtgggtggtggtggtg                                         |                                            |                  |
| pglL-C-A-F                                                                                                                                               | gccgcaaactgccgatttaaatcctgcctgcttc                                           | Construction of PglL <sub>mut</sub>        |                  |
| pglL-C-A-R                                                                                                                                               | ttaaatcggcagtttggcggcggggtgcgcgcccga                                         |                                            |                  |
| SacI-U                                                                                                                                                   | c <u>gagct</u> ctgcataattcgtgctcaaggcgcaactc                                 |                                            |                  |
| PstI-D                                                                                                                                                   | aact <u>gcagg</u> gcagtttatggcggg                                            |                                            |                  |
| <b>Primers below were applied to create mutation of amino acids by using nested-PCR SacI-U was the upstream primer for the following amplifications.</b> |                                                                              |                                            |                  |
| 5573-D1(5569-D1)                                                                                                                                         | agaagtgttggccggccattcgcctcggccgcatgcgctaaa<br>cgct                           | Shorten the sequence of glycosylation site |                  |
| 5573-D2                                                                                                                                                  | gg <u>actag</u> ttttgatttcagaggaggtgccacgccgagagaagtgtgt<br>tgccggg          |                                            |                  |
| 5569-D2                                                                                                                                                  | gg <u>actag</u> tgagggtgccacgccgagagaagtgtgttgccggg                          |                                            |                  |
| 5566-D                                                                                                                                                   | gg <u>actag</u> tcacgccgagagaagtgtgttgccggccattcgcctc<br>gccgcatgcgctaaacgct |                                            |                  |
| 5866-D                                                                                                                                                   | gg <u>actag</u> tcacgccgagagaagtgtgttgccggctcggccgcca<br>tgcgctaaac          |                                            |                  |
| 5566AA(5666A A,5766AA and 5866AA)-D1                                                                                                                     | gtcgaggtcgcgcccacgttgcgcggtcctcggcccgatgcg<br>ctaaacgct                      |                                            |                  |
| 5566AA-D2                                                                                                                                                | cacgccgagagaagtgtgttgccggccattcgcctcagagtcgc<br>cgcca                        |                                            |                  |
| 5666AA-D2                                                                                                                                                | cacgccgagagaagtgtgttgccggccattcgtcagagtcgcgc<br>cgacttg                      |                                            |                  |
| 5766AA-D2                                                                                                                                                | cacgccgagagaagtgtgttgccggccagtcagagtcgcgcgc<br>acgttg                        |                                            |                  |
| 5866AA-D2                                                                                                                                                | cacgccgagagaagtgtgttgccgggtcagagtcgcgcgcgac<br>gtt                           |                                            |                  |
| 5566AA(5666A A,5766AA and 5866AA)-D3                                                                                                                     | gg <u>actag</u> tcgcgcccgttgcgggctgcacgccgagagaagtgt                         |                                            |                  |
| 5566AA-D1                                                                                                                                                | As shown above                                                               |                                            | Alanine scanning |

|                            |                                                                       |                                                        |
|----------------------------|-----------------------------------------------------------------------|--------------------------------------------------------|
| 5766AA-57A-D2              | cgggctgcacgccggcagaagtgttggccggcgctcaggtc<br>gccgccgacgt              | of shortened glycosylation site                        |
| 5766AA-58A-D2              | cgggctgcacgccggcagaagtgttggccggccagtcaggtc<br>gccgccgacgt             |                                                        |
| 5766AA-59A-D2              | cgggctgcacgccggcagaagtgttggccggccagtcaggtc<br>gccgccgacgt             |                                                        |
| 5766AA-60A-D2              | cgggctgcacgccggcagaagtgttggccggccagtcaggtc<br>gccgccgacgt             |                                                        |
| 5766AA-61A-D2              | cgggctgcacgccggcagaagtggcgttggccggccagtcaggtc<br>gccgccgacgt          |                                                        |
| 5766AA-62A-D2              | cgggctgcacgccggcagaagcgttggccggccagtcaggtc<br>gccgccgacgt             |                                                        |
| 5766AA-57A(58^62A)-D3      | <u>ggactagtgcgcggcggttggccggctgcacgccggcaga</u>                       |                                                        |
| 5766AA-65A,66A-D2          | agaagtgttggccggccagtcaggtcggccgacgttg                                 |                                                        |
| 5766AA-65A-D3              | <u>ggactagtgcgcggcggttggccggctgcacggcggcagaagtgtt</u><br>ggtgccgggcca |                                                        |
| 5766AA-66A-D3              | <u>ggactagtgcgcggcggttggccggctgcgcggcggcagaagtgtt</u><br>ggtgccgggcca |                                                        |
| 5566AA-D1                  | As shown above                                                        | Optimization of the recognition motif between WP and S |
| NNT-D2                     | ccgggctgcacgccggcagaagtgttggccagtcaggtcgc<br>cgccgacgt                |                                                        |
| NT-D2                      | ccgggctgcacgccggcagaagtgttggccagtcaggtcgc<br>cgacgt                   |                                                        |
| GNT-D2                     | ccgggctgcacgccggcagaagtgttggccagtcaggtcgc<br>cgccgacgt                |                                                        |
| GT-D2                      | ccgggctgcacgccggcagaagtggccggccagtcaggtcgc<br>cgacgt                  |                                                        |
| GAT-D2                     | ccgggctgcacgccggcagaagtggcggccagtcaggtcgc<br>cgccgacgt                |                                                        |
| GAA-D2                     | ccgggctgcacgccggcagaagcggcgccggccagtcaggtc<br>gccgccgacgt             |                                                        |
| WPAAAS(AA A)-D2            | ccgggctgcacgccggcagaagcggcgccggccagtcaggtc<br>gccgccgacgt             |                                                        |
| WPAAS-D2                   | ccgggctgcacgccggcagaagcggcgccggccagtcaggtcgc<br>cgccgacgt             |                                                        |
| WPAS-D2                    | ccgggctgcacgccggcagaagcggcgccggccagtcaggtcgc<br>cgccgacgt             |                                                        |
| WPS-D2                     | ccgggctgcacgccggcagagggccagtcaggtcggccgacg<br>t                       |                                                        |
| NNT(NT, GNT, GT, GAT, GAA, | <u>ggactagtgcgcggcggttggccggctgcacgccggcaga</u>                       |                                                        |

|                              |                                                                |                                               |
|------------------------------|----------------------------------------------------------------|-----------------------------------------------|
| AAA, WPAAS, WPAS and WPS)-D3 |                                                                |                                               |
| 5566AA-D1                    | As shown above                                                 | Optimization of the recognition motif after S |
| SAG(SA, S, SAP and SP)-D2    | agaagcggcggcggccagtcgaggtcgcgcgcgcacgt                         |                                               |
| SAG-D3                       | ggactagtgcgcggcggtttgccgggctggccggcagaagcggcg<br>gcgggcca      |                                               |
| SA-D3                        | ggactagtgcgcggcggtttgccgggctgggcagaagcggcg<br>ggcca            |                                               |
| S-D3                         | ggactagtgcgcggcggtttgccgggctgagaagcggcg<br>ca                  |                                               |
| SAP-D3                       | ggactagtgcgcggcggtttgccgggctggggggcagaagcggcg<br>gcgggcca      |                                               |
| SP-D3                        | ggactagtgcgcggcggtttgccgggctggggagaagcggcg<br>ggcca            |                                               |
| 5566AA-D1                    | As shown above                                                 |                                               |
| SAG-D2                       | As shown above                                                 |                                               |
| 3A-AP-D3                     | ggactagtgcgcggcggtttgccgggctggggggcagaagcggcg<br>gcgggccaagtcg |                                               |
| 3A-QP-D3                     | ggactagtgcgcggcggtttgccgggctgggggtgagaagcggcg<br>cgggccagtcg   |                                               |
| 3A-FP-D3                     | ggactagtgcgcggcggtttgccgggctggggaaagaagcggcg<br>gcgggccaagtcg  |                                               |
| 3A-DP-D3                     | ggactagtgcgcggcggtttgccgggctggggatcagaagcggcg<br>cgggccagtcg   |                                               |
| 3A-HP-D3                     | ggactagtgcgcggcggtttgccgggctggggatgagaagcggcg<br>gcgggccaagtcg |                                               |
| 3A-KP-D3                     | ggactagtgcgcggcggtttgccgggctggggctagaagcggcg<br>cgggccagtcg    |                                               |
| 3A-SP-D3                     | ggactagtgcgcggcggtttgccgggctggggactagaagcggcg<br>cgggccagtcg   |                                               |
| 3A-PP-D3                     | ggactagtgcgcggcggtttgccgggctgggggtgagaagcggcg<br>gcgggccaagtcg |                                               |
| 3A-WP-D3                     | ggactagtgcgcggcggtttgccgggctggggccaagaagcggcg<br>gcgggccaagtcg |                                               |
| 3A-YP-D3                     | ggactagtgcgcggcggtttgccgggctggggataagaagcggcg<br>cgggccagtcg   |                                               |
| 3A-EP-D3                     | ggactagtgcgcggcggtttgccgggctggggttcagaagcggcg<br>cgggccagtcg   |                                               |
| 3A-RP-D3                     | ggactagtgcgcggcggtttgccgggctggggacgagaagcggcg<br>gcgggccaagtcg |                                               |

|           |                                                                            |                                                                                                       |
|-----------|----------------------------------------------------------------------------|-------------------------------------------------------------------------------------------------------|
| 3A-GP-D3  | ggactagtgcgcggcggtttgccgggctgggggtccagaagcggcgg<br>cggggccagtcg            |                                                                                                       |
| 3A-VP-D3  | ggactagtgcgcggcggtttgccgggctgggggacagaagcggcg<br>gcggggccagtcg             |                                                                                                       |
| 3A-LP-D3  | ggactagtgcgcggcggtttgccgggctgggggagagaagcggcg<br>gcggggccagtcg             |                                                                                                       |
| 3A-IP-D3  | ggactagtgcgcggcggtttgccgggctgggggatagaagcggcg<br>gcggggccagtcg             |                                                                                                       |
| 3A-CP-D3  | ggactagtgcgcggcggtttgccgggctggggacaagaagcggcg<br>gcggggccagtcg             |                                                                                                       |
| 3A-MP-D3  | ggactagtgcgcggcggtttgccgggctggggcatagaagcggcgg<br>cggggccagtcg             |                                                                                                       |
| 3A-NP-D3  | ggactagtgcgcggcggtttgccgggctggggattagaagcggcgg<br>cggggccagtcg             |                                                                                                       |
| 3A-TP-D3  | ggactagtgcgcggcggtttgccgggctggggagtagaagcggcg<br>gcggggccagtcg             |                                                                                                       |
| P30-P2-D1 | accctcaacaaaagctaacggtaaaattattaaactggcccgcat<br>gcgctaaacgc               | Replaced hydrophilic fragments with P30 and P2                                                        |
| P30-P2-D2 | gcggcgggccattctaaatgactagcagatacttaggaaccctcaac<br>caaaagctaac             |                                                                                                       |
| P30-P2-D3 | atttagaatttgctttatatactggggggcagaagcggcggcggcca<br>ttctaaatg               |                                                                                                       |
| P30-P2-D4 | ggactagtctcagttatactataaatttagaatttgctttatat                               |                                                                                                       |
| 5566AA-D1 | As shown above                                                             | Replaced hydrophilic fragment at C-terminal with P30, gp100 <sup>44-59</sup> or HA <sup>307-319</sup> |
| P30-D2    | aaccaaagctaacggtaaaattattaaagggggcagaagcggcgg<br>cggggccagtcgaggtcggccgacg |                                                                                                       |
| P30-D3    | ggactagttctaaatgactagcagatacttaggaaccctcaacaaa<br>agctaacggtaaaat          |                                                                                                       |
| gp-D2     | ccattcgggatacagttggcggtccagggggcagaagcggcggcg<br>ggccagtcgaggtcggccgacgt   |                                                                                                       |
| gp-D3     | ggactagtgtcgagcgctgggcctcagtcattcgggatacagttgg<br>cgg                      |                                                                                                       |
| HA-D2     | gtgttctgttgactactggggccagaagcggcggcggggccagtc<br>gaggtcggccgacgt           |                                                                                                       |
| HA-D3     | ggactagtggcgcgagcttcagagtggtctgttgactacttggg                               |                                                                                                       |
